# Supplementary material for: Dysfunction of Glutamate Delta-1 Receptor-Cerebellin 1 Trans-Synaptic Signaling in the Central Amygdala in Chronic Pain
Source: MDPI journal article supplement (doi:10.3390/cells10102644), 2021-10-03

## EXTENDED DATA:

**Supplementary Figure S1. (A)** 3D reconstruction video of GluD1 (green) localization on PKC $\delta$ + neurons (red) in the CeA.

**Supplementary Figure S2. GluD1 effect on excitatory neurotransmission and excitability. (A)** No significant effect of GluD1 deletion on excitatory neurotransmission in CeL neurons (Frequency:  $p = 0.16$ , Amplitude:  $p = 0.74$ , two-tailed unpaired t-test,  $df = 14$ ,  $n = 8$ ). **(B)** No significant change in excitability of CeC neurons in GluD1 KO mice (Two-way repeated measures ANOVA, genotype  $F(1, 27) = 2.61$ ,  $p = 0.12$ ; WT:  $n = 14$ , GluD1 KO:  $n = 15$ ).

**Supplementary Figure S3. Time course of GluD1 and Cbln1 downregulation in CFA-induced pain model. (A)** Immunohistochemistry analysis indicating the trajectory of GluD1 volume reduction around PKC $\delta$  cell at 6, 24, 48 hrs and 1-week timepoints after intraplantar CFA administration (One-way ANOVA, treatment  $F(4, 20) = 20.1$ ,  $p < 0.0001$ ; Bonferroni's post hoc test, Saline ( $n = 8$  mice) vs. CFA 6 hrs ( $n = 3$  mice)  $*p = 0.019$ , vs CFA 24 hrs ( $n = 3$  mice)  $***p = 0.0001$ , vs CFA 48 hrs ( $n = 6$  mice)  $****p < 0.0001$ , vs CFA-1 week ( $n = 5$  mice)  $****p < 0.0001$ ). **(B)** Immunohistochemistry analysis indicating the trajectory of Cbln1 puncta number reduction at 6, 24, 48 hrs and 1-week timepoints after intraplantar CFA administration (One-way ANOVA, treatment  $F(3, 8) = 34.85$ ,  $p < 0.0001$ ; Bonferroni's post hoc test, Saline ( $n = 3$  mice) vs. CFA 6 hrs ( $n = 3$  mice)  $**p = 0.004$ , vs CFA 24 hrs ( $n = 3$  mice)  $***p = 0.0004$ , vs CFA-1 week ( $n = 3$  mice)  $****p < 0.0001$ ). **(C)** Western blot analysis showing downregulation of GluD1 in synaptoneurosomal preparation of CeA. Induction of inflammatory pain lead to a downregulation of GluD1 in the CeA at 48 h and 1 week after CFA injection (One-way ANOVA, treatment  $F(2, 17) = 6.35$ ,  $p = 0.0087$ , Dunnett's multiple comparison, Saline ( $n = 7$  mice) vs. CFA 48 hrs ( $n = 7$  mice):  $1.02 \pm 0.05$  vs.  $0.69 \pm 0.08$ ,  $**p = 0.0094$ ; Saline vs CFA 1 week ( $n = 6$  mice):  $1.02 \pm 0.05$  vs.  $0.71 \pm 0.08$ ,  $*p = 0.019$ ). **(D)** An upregulation of AMPA receptors is observed in the model of inflammatory pain in the CeA 1 week

after CFA injection (Saline vs. CFA: 1 week time point-  $0.975 \pm 0.032$  vs.  $1.169 \pm 0.066$ ,  $*p = 0.0401$ , Unpaired t-test,  $n = 4$  mice/treatment).

**Supplementary Figure S4. Effect of recombinant Cbln1 in pain models.** (A) Effect of recombinant Cbln1 injected at a lower volume (250 ng in 250 nl on each side) in the CeA also rescued mechanical hypersensitivity ( $n = 3$  mice). Injection of recombinant Cbln1 (250 ng in 250 nl on each side) into the dorsal striatum (DS) did not lead to a persistent reduction in mechanical hypersensitivity in von Frey test ( $n = 3$  mice). No effect of Cbln1 in the dorsal striatum in GluD1 KO ( $n = 3$  mice). (B) Cbln1 reduced mechanical hypersensitivity in cisplatin-induced neuropathic pain model. Intracerebroventricular injection of Cbln1 (1.5  $\mu$ g and 3  $\mu$ g) reduced mechanical hypersensitivity in cisplatin-induced neuropathy mice (Two-way repeated measures ANOVA (6 hrs -96 hrs after each injection) Treatment  $F(1, 7) = 5.87$ ,  $p = 0.046$ ,  $n = 4$  mice (vehicle), 5 mice (Cbln1)).

**Supplementary Figure S5. Deletion of GluD1 does not affect basal pain sensitivity.** Wildtype and GluD1 KO were evaluated for (A) tail flick test, (B) hot plate test, (C) von Frey filament and (D) gabapentin-induced conditioned place preference tests. No changes these paradigms were observed ( $n=6-8$  mice). (E) Sensitivity in formalin test was assessed in wildtype and GluD1 KO. Significantly higher licking behavior was observed in GluD1 KO (Two-way ANOVA, interaction  $F(1, 21) = 6.25$ ,  $p = 0.020$ , Bonferroni's post hoc test, WT formalin ( $n = 8$  mice) vs GluD1 KO formalin ( $n = 5$  mice),  $*p = 0.033$ , WT saline ( $n = 7$  mice), GluD1 KO saline ( $n = 5$  mice)).

**Supplementary Figure S6.** (A) Intra-CeA Cbln1 leads to conditioned place aversion in mice (Vehicle ( $n=4$  mice) vs Cbln1 ( $n = 6$  mice),  $-7.925 \pm 4.868$  vs.  $-67.38 \pm 21.97$ ,  $*p = 0.0419$ , unpaired t-test).

**Supplementary Figure S7.** Western blot original images.

Supplementary Figure S1 Video

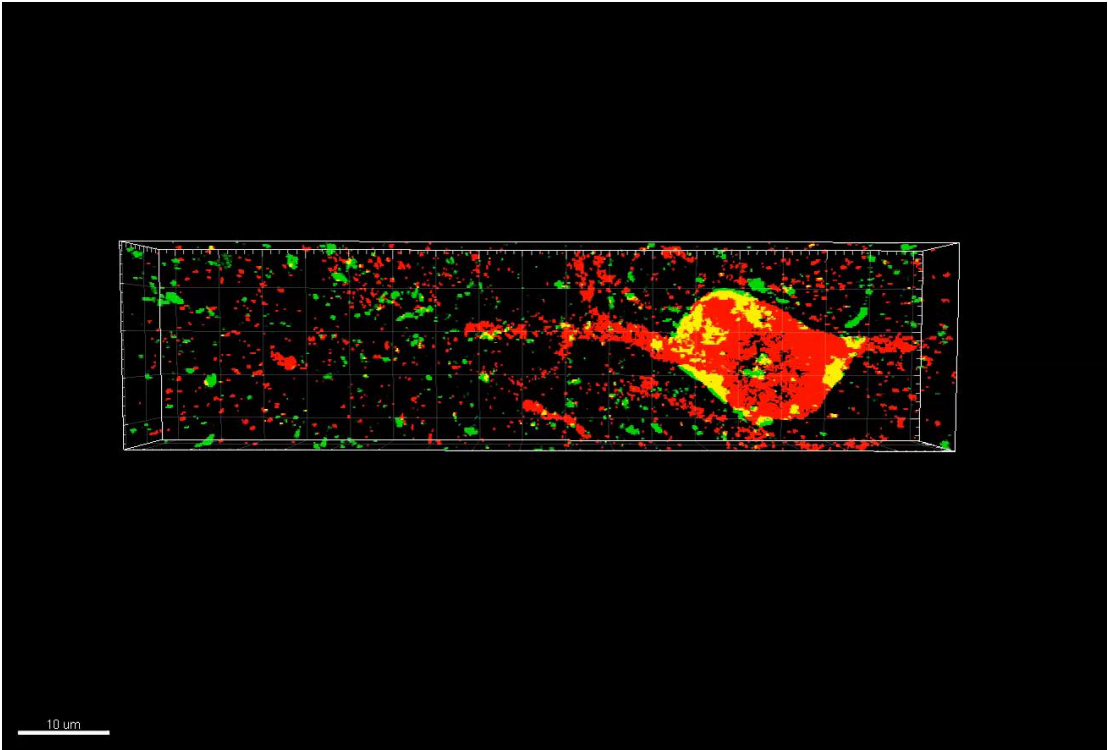

Supplementary Figure S2

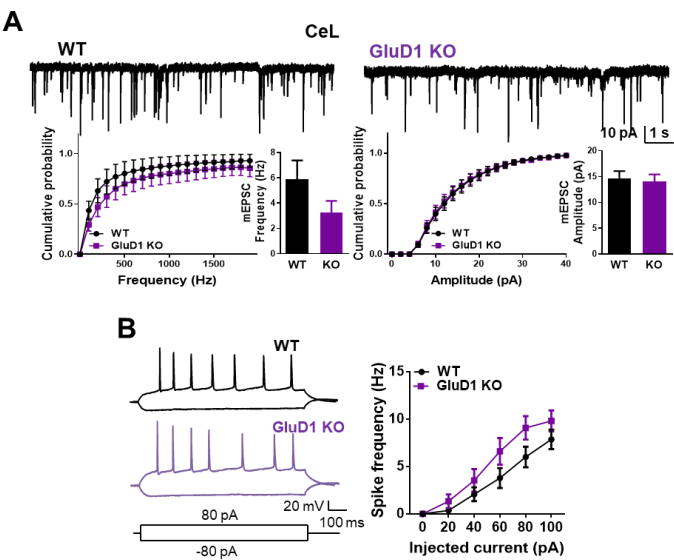

Supplementary Figure S3

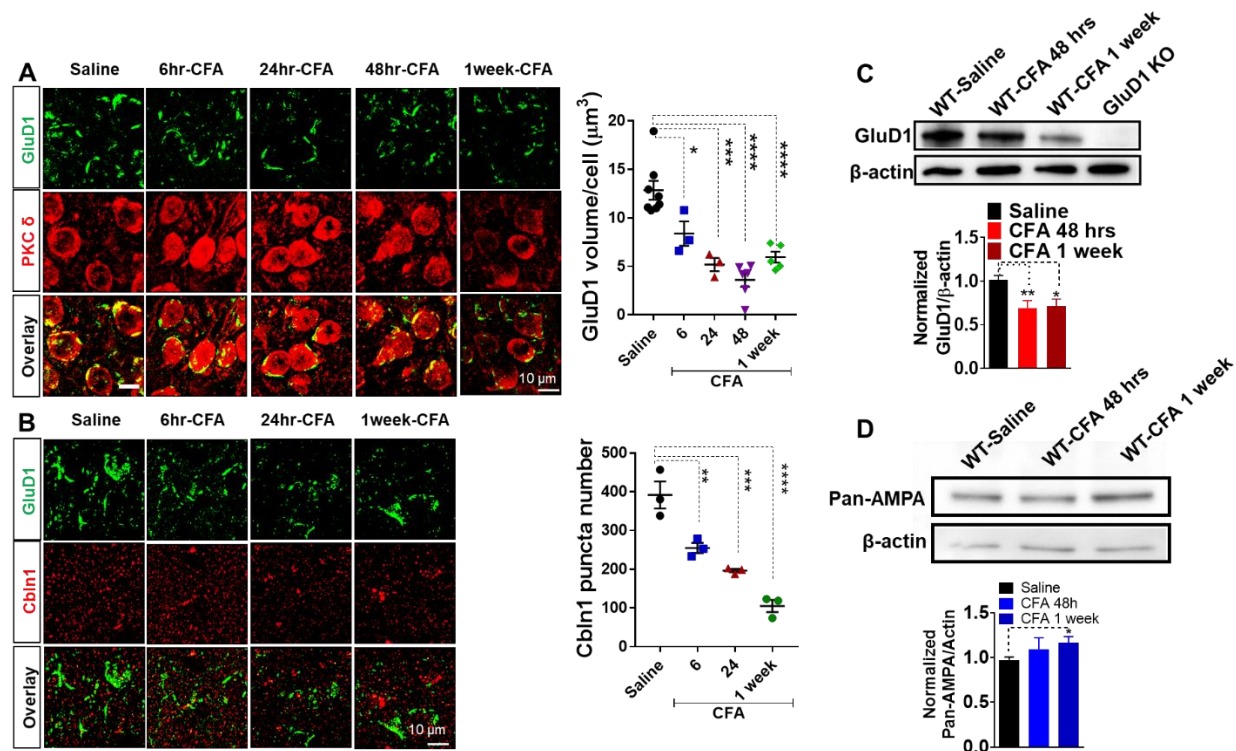

Supplementary Figure S4

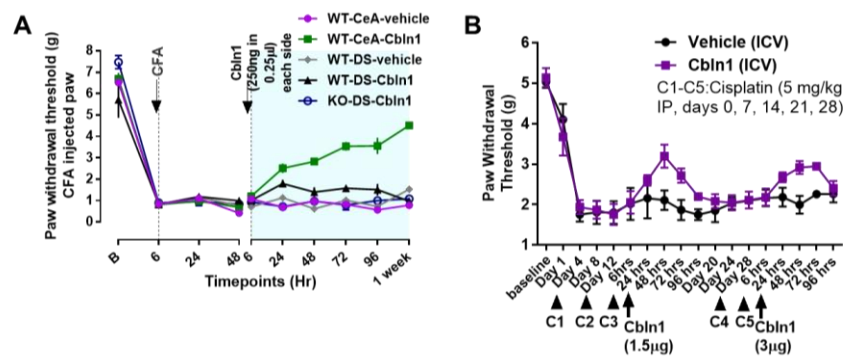

Supplementary Figure S5

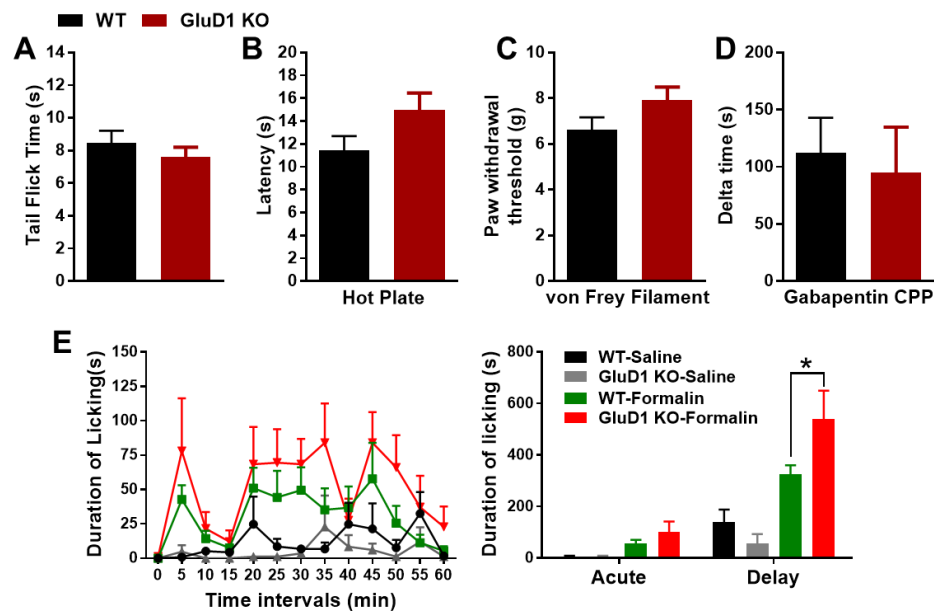

## Supplementary Figure S6

**A**

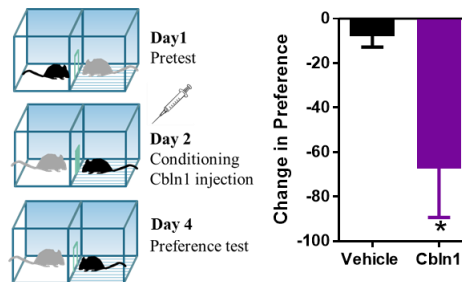



Supplementary Figure S7: Western blot original images.

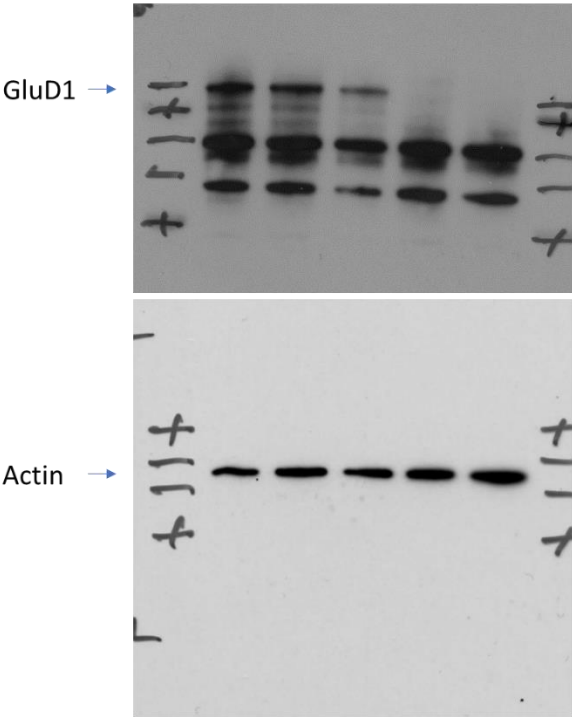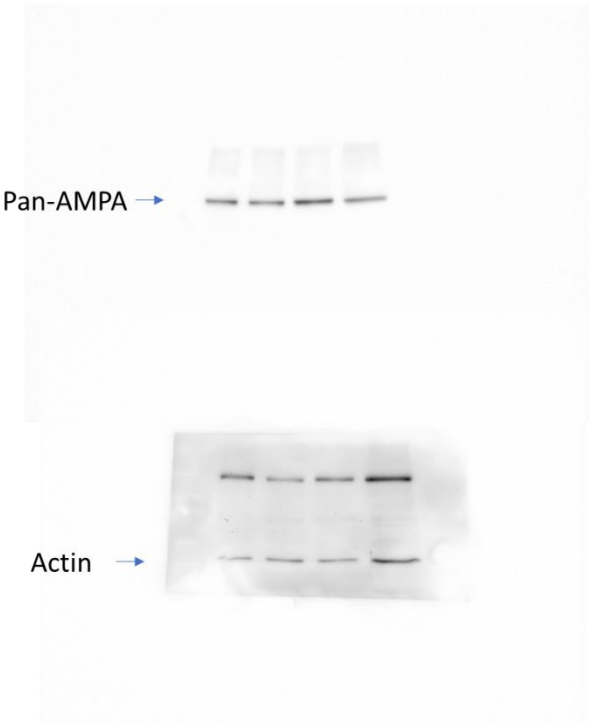

Supplement: s1 [file s1]
